# Supplementary material for: Dietary plant sterols prevented cholesterol gallstone formation in mice
Source: Royal Society of Chemistry journal article supplement (doi:10.1039/d1fo02695j), 2021-01-01
Supplement: d1fo02695j1.xlsx [file d1fo02695j1.xlsx]

## Sheet: Sheet1
The main components of our plant sterols
Item	Result(%)
β-sitosterol	42.18
Stigmasterol	26.87
Campesterol	25.63
Brassicasterol	0.9
Total phytosterols	95.58
