# Supplementary material for: Dietary plant sterols prevented cholesterol gallstone formation in mice
Source: Royal Society of Chemistry journal article supplement (doi:10.1039/d1fo02695j), 2021-01-01
Supplement: d1fo02695j2.xlsx [file d1fo02695j2.xlsx]

## Sheet: Sheet1
The primer sequence involved in the experiment
Gapdh-F	TGTGTCCGTCGTGGATCTGA
Gapdh-R	CCTGCTTCACCACCTTCTTGAT
Abcg5-F	AATGCTGTGAATCTGTTTCCCA
Abcg5-R	CCACTTATGATACAGGCCATCCT
Cyp7a1-F	AGCAACTAAACAACCTGCCAGTACTA
Cyp7a1-R	GTCCGGATATTCAAGGATGCA
Cyp2c70-F	TGGCTTTCTCAGCAGGAAGAA
Cyp2c70-R	AACTGGCTTGGTGTCGATGT
Hmgcr-F	CTTGTGGAATGCCTTGTGATTG
Hmgcr-R	AGCCGAAGCAGCACATGAT
Abcg8-F	TGCCCACCTTCCACATGTC
Abcg8-R	ATGAAGCCGGCAGTAAGGTAGA
Npc1l1-F	ATC CTC ATC CTG GGC TTT GC
Npc1l1-R	GCA AGG TGA TCA GGA GGT TGA
Srb1-F	CGG GAG CGT GGA CCC TAT GT
Srb1-R	ACA CGG TGT CGT TGT CAT TGA
Acat1-F	CGG AGG AGC TGA AGC CAC TA
Acat1-R	CGA TGC GGA CTT TTC AAT GAG
